# Supplementary material for: High-efficiency Rosa26 knock-in vector construction for Cre-regulated overexpression and RNAi
Source: Springer Nature journal article supplement (doi:10.1186/1755-8417-1-3), 2008-11-03

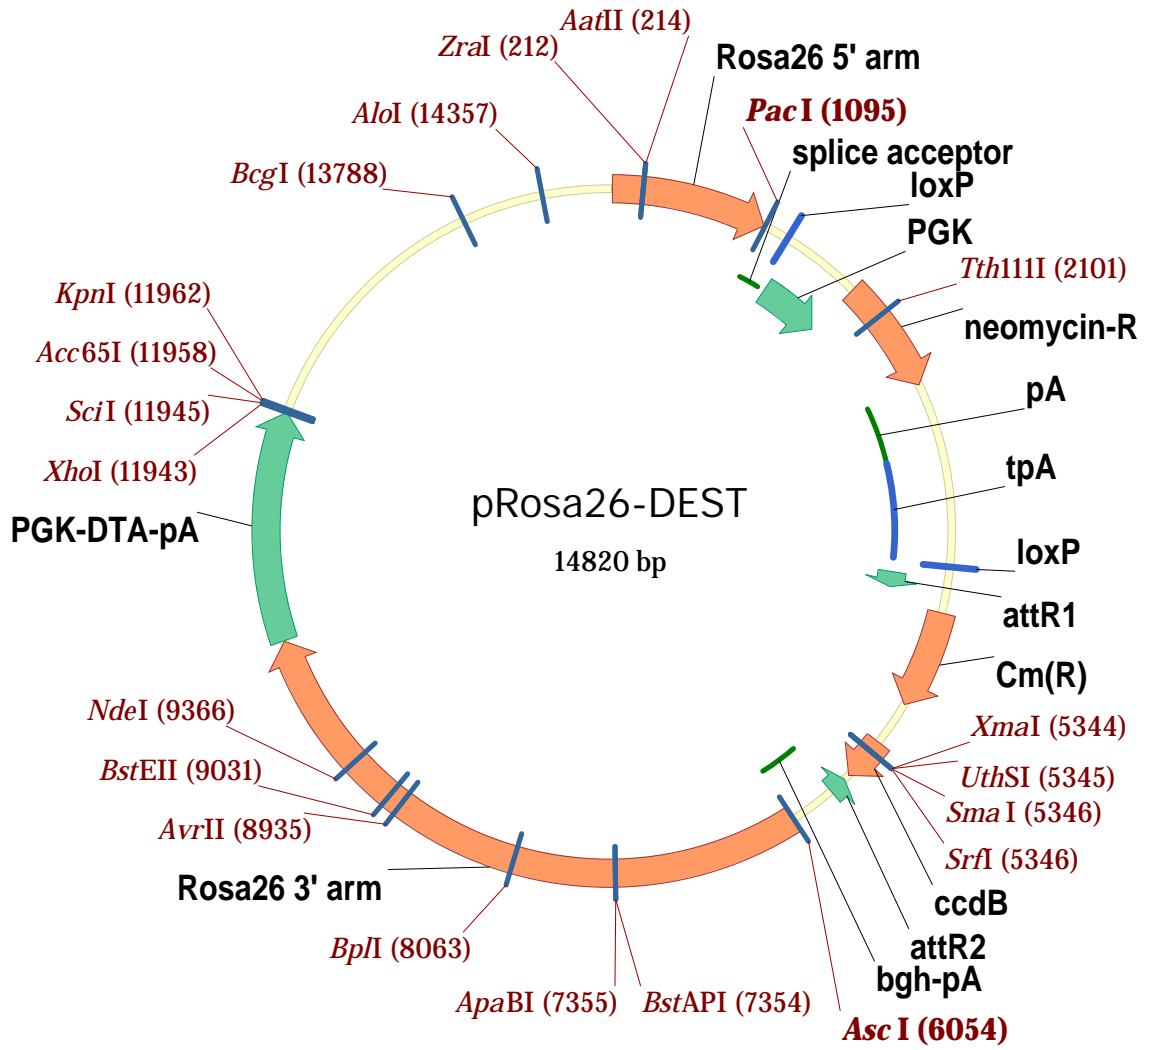

Supplement: Additional file 3 [file 1755-8417-1-3-s3.pdf]
